# Supplementary material for: Statin Effects on Aggression: Results from the UCSD Statin Study, a Randomized Control Trial
Source: PubMed Central journal article supplement (PMC4488854; doi:10.1371/journal.pone.0124451), 2015-07-01
Supplement: pone.0124451.s001.pdf [file pone.0124451.s001.pdf]

**Appendix I**

**Figure 1.** Abbreviated Mevalonate Pathway.....Page 2

**Figure 2.** Consort Flow Diagram: Combined Sample (Men & Women).....Page 3

**Figure 3.** Consort Flow Diagram: Men.....Page 4

**Figure 4.** Consort Flow Diagram: Women.....Page 5

**Table 1.** Reasons for Study Drops.....Page 6

**Table 2.** Statin Effects on Lipids.....Page 7

**Figure 1. Abbreviated Mevalonate Pathway.**

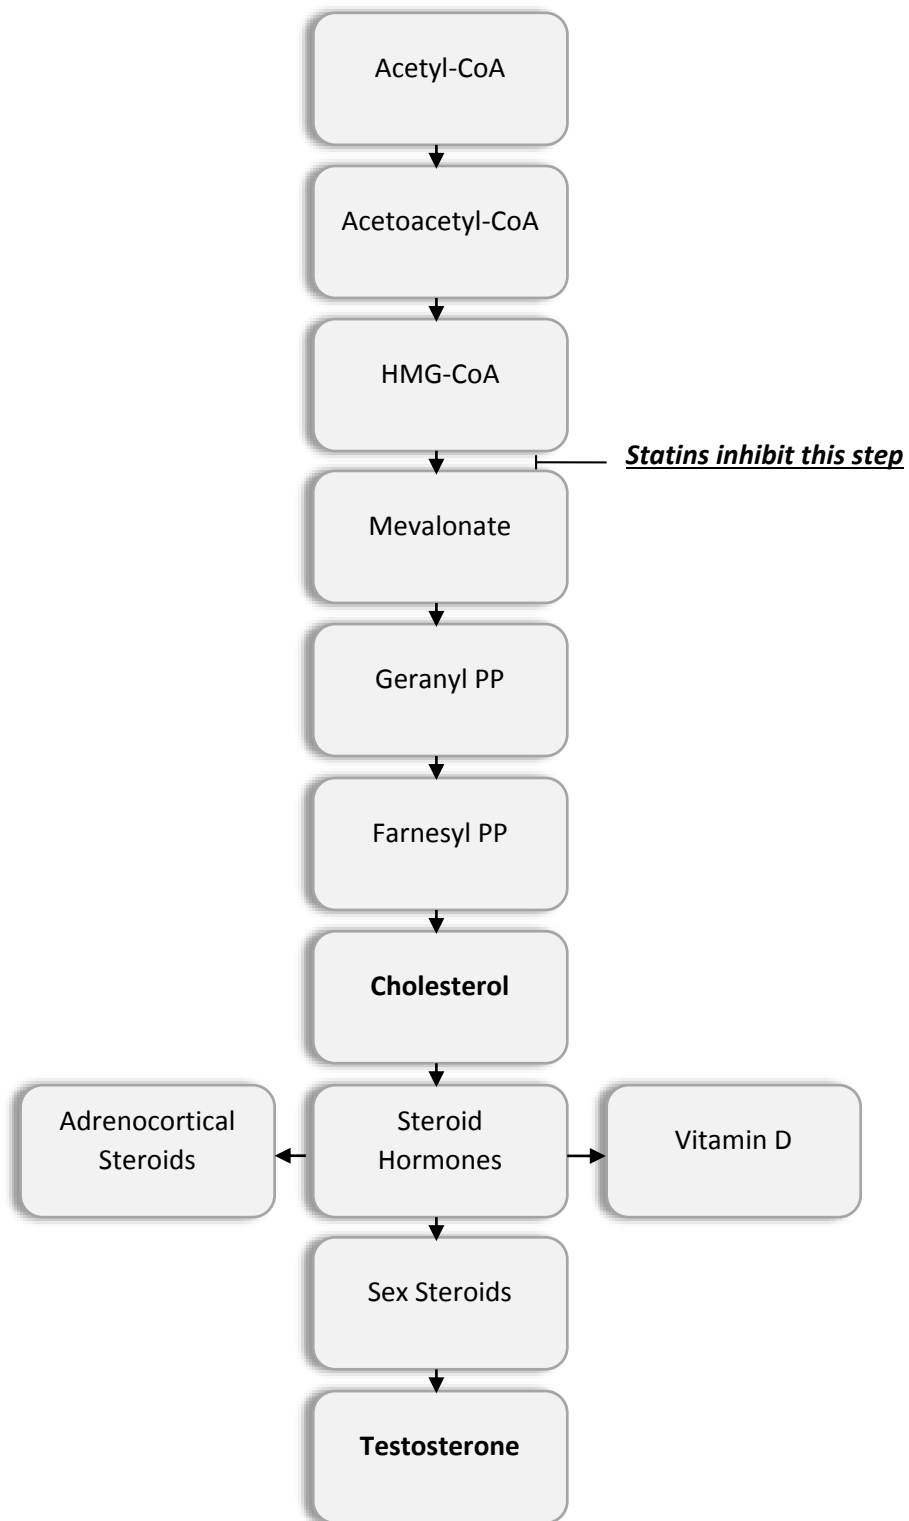

**Figure 1 legend.** Depicts site of inhibition by statins; shows cholesterol and testosterone as products of the affected pathway.

**Figure 2. Consort Flow Diagram: Combined Sample (Men & Women).**

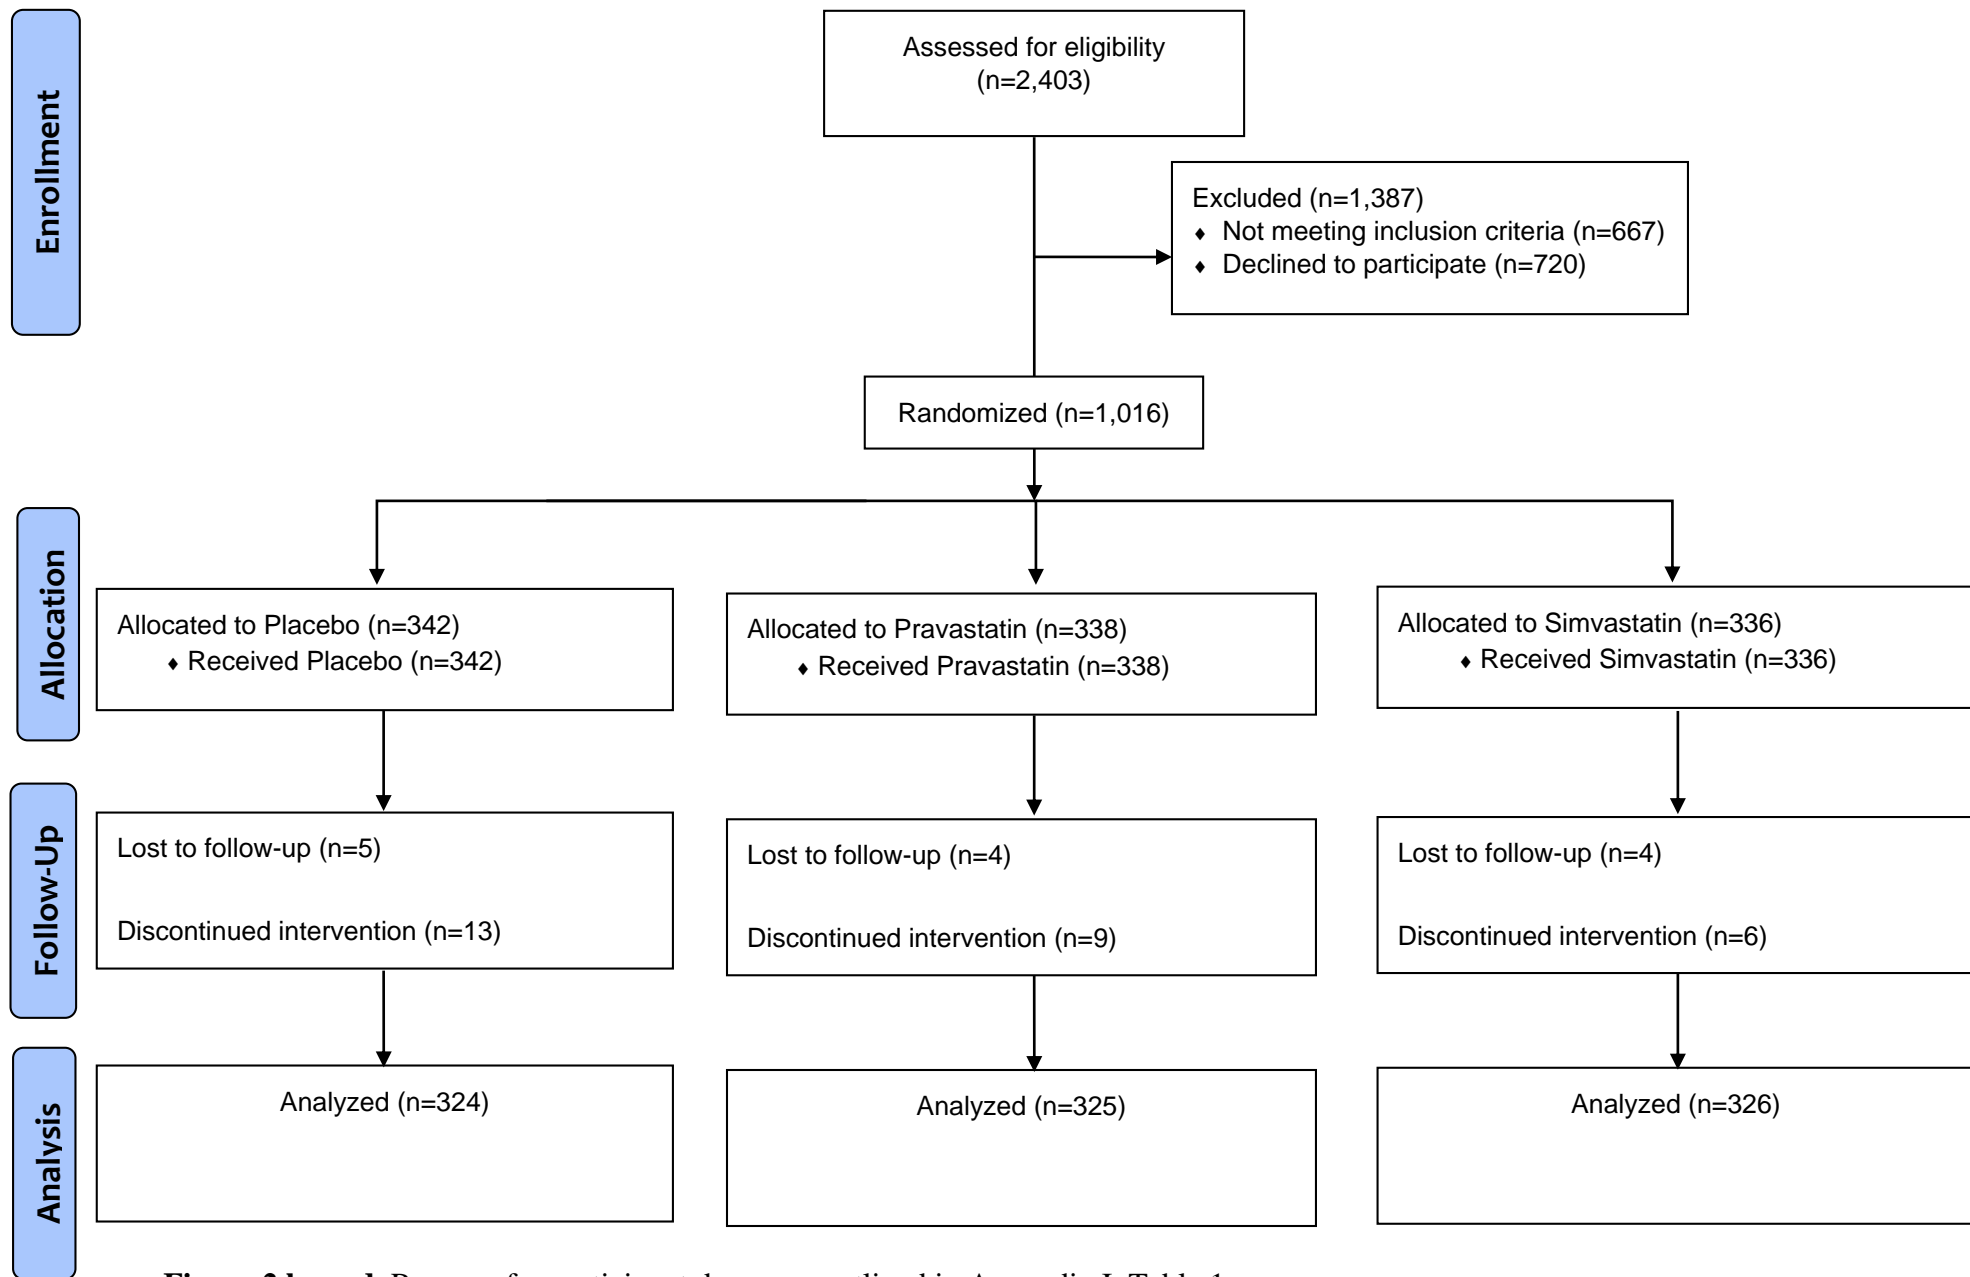

**Figure 2 legend.** Reasons for participant drops are outlined in Appendix I, Table 1.

**Figure 3. Consort Flow Diagram: Men.**

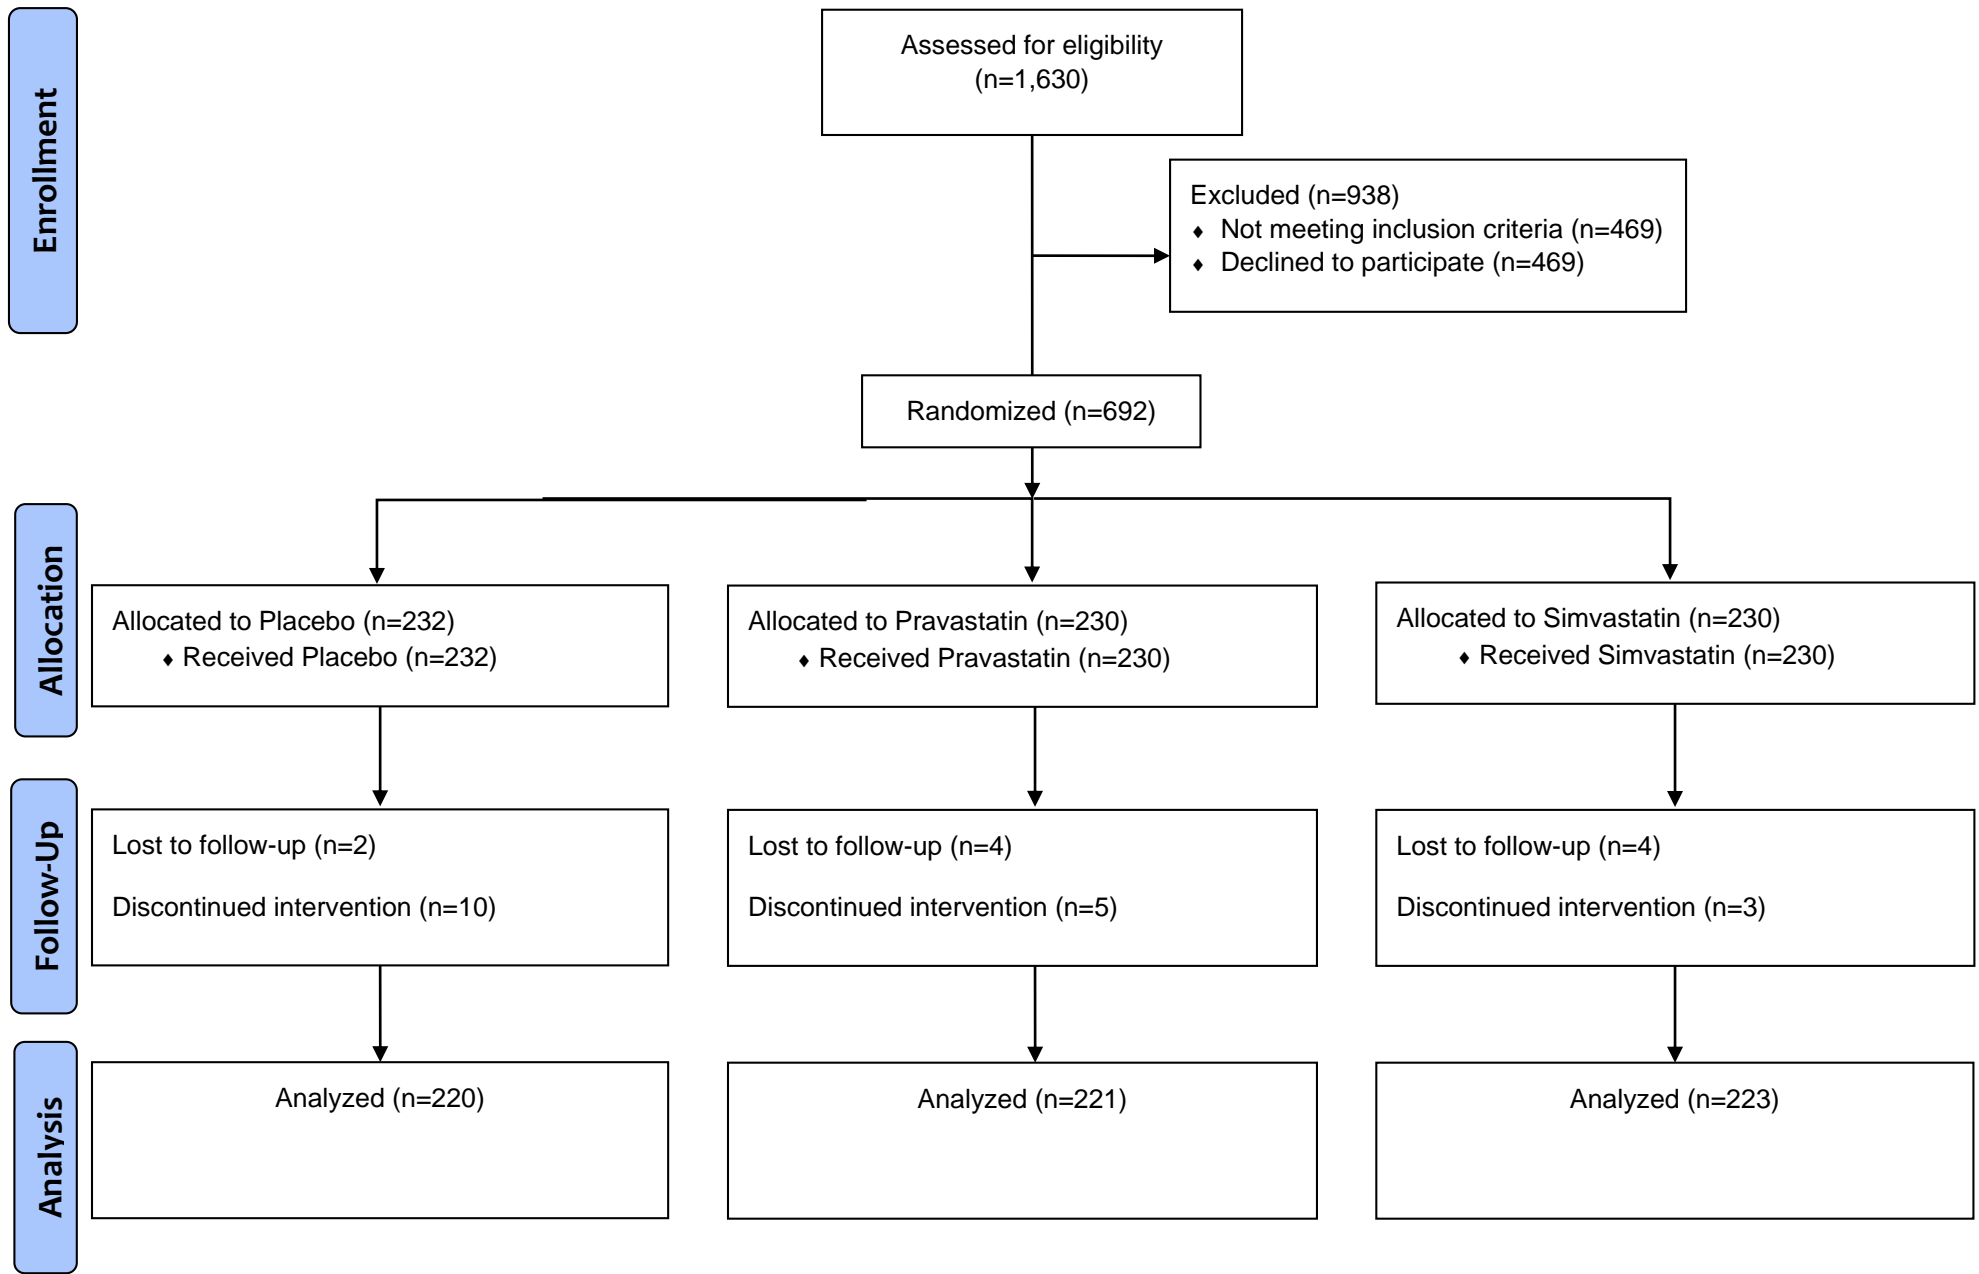

**Figure 3 legend.** Reasons for participant drops are outlined in Appendix I, Table 1.

**Figure 4. Consort Flow Diagram: Women.**

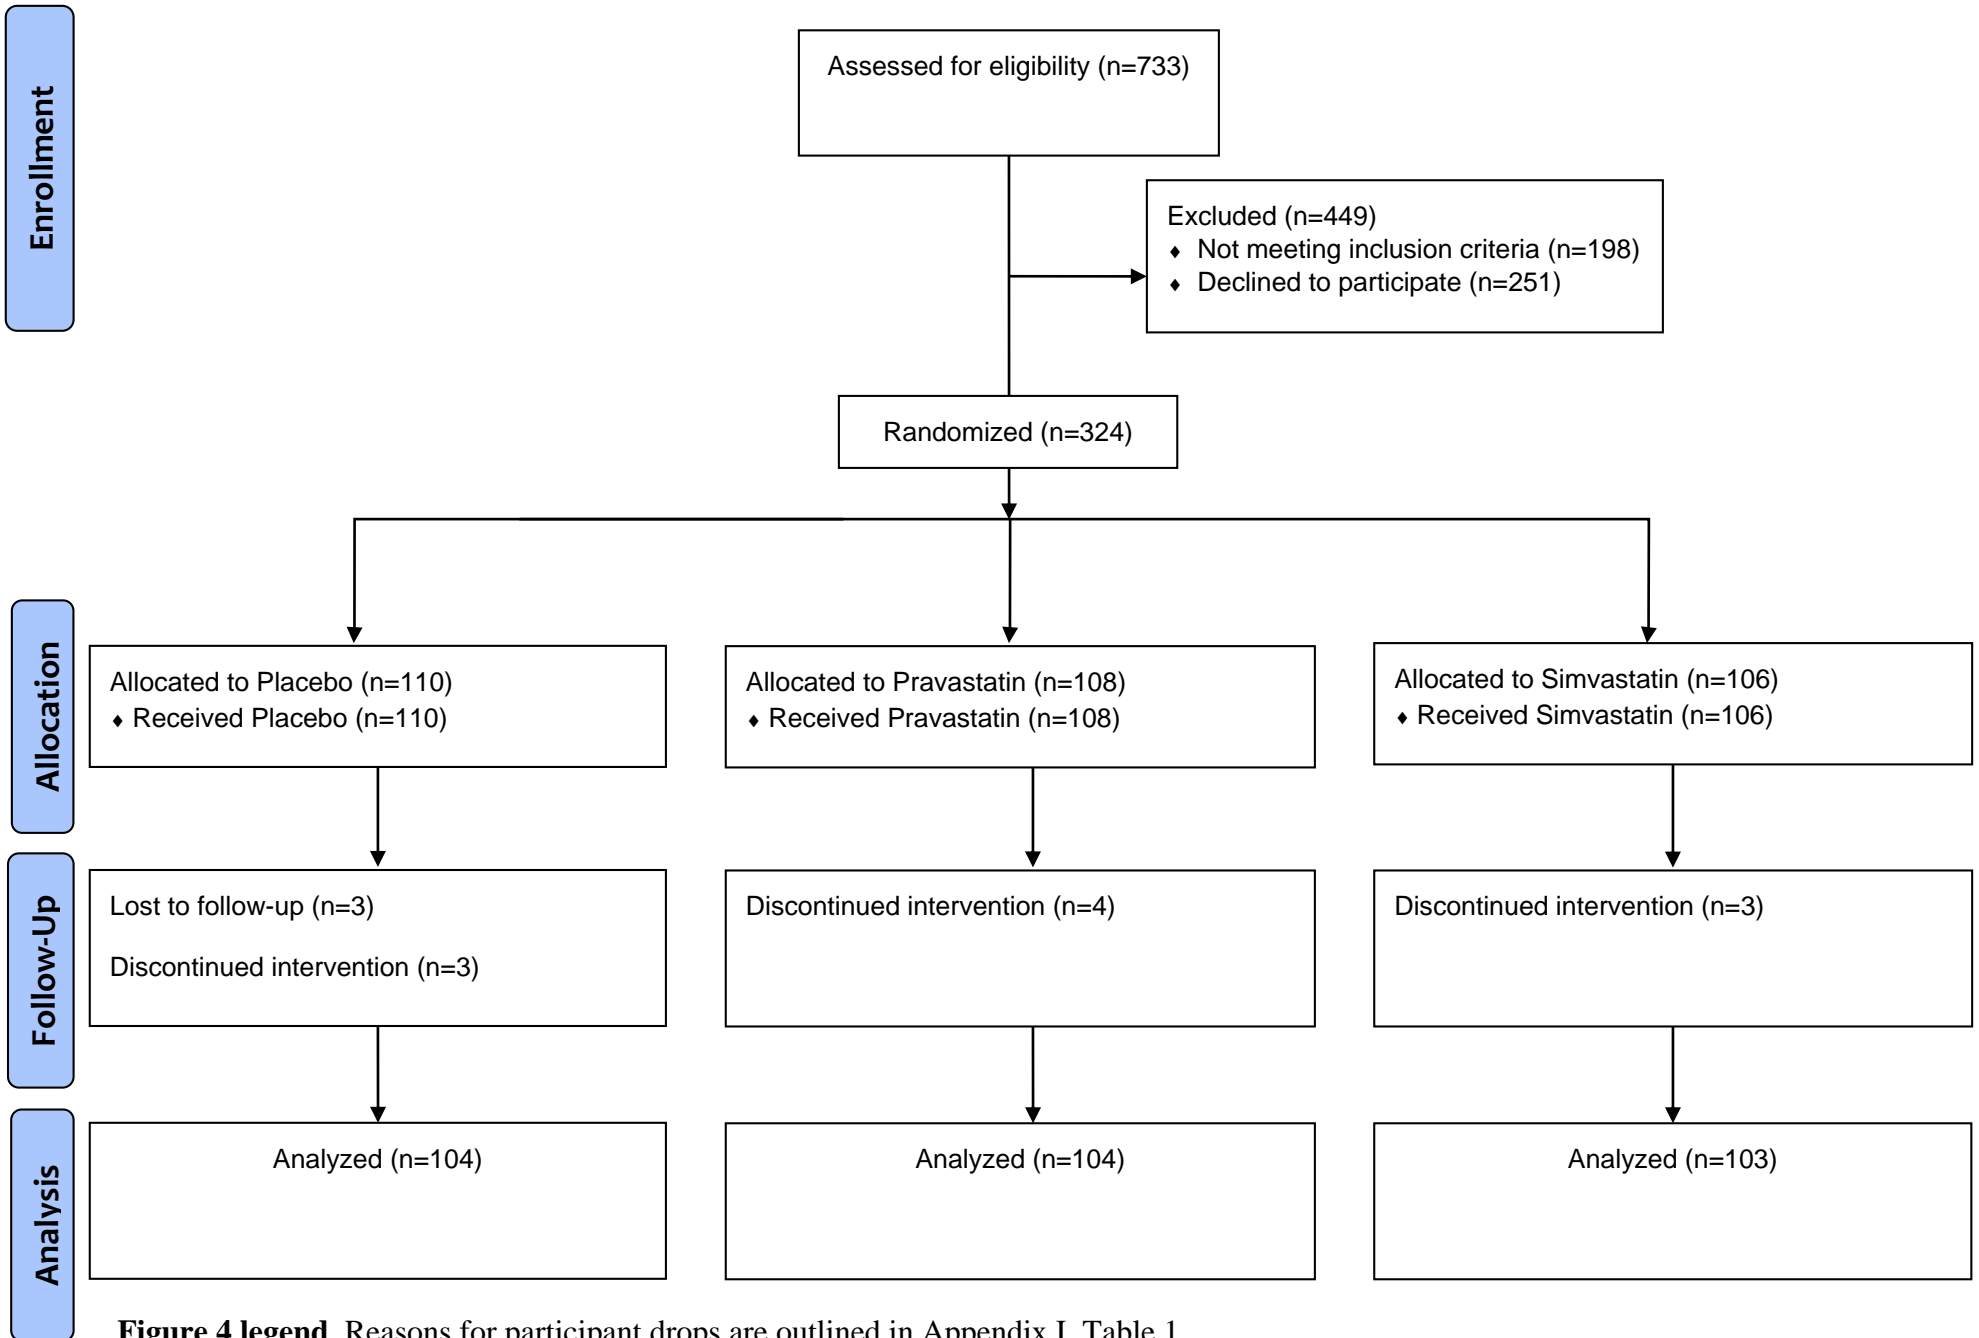

**Figure 4 legend.** Reasons for participant drops are outlined in Appendix I, Table 1.

**Table 1. Reasons for Study Drops.**

|                                                                                                   | <b>Placebo</b>                                                                         | <b>Pravastatin</b>                                                                                                                                                                                                                  | <b>Simvastatin</b>                                                                                       |
|---------------------------------------------------------------------------------------------------|----------------------------------------------------------------------------------------|-------------------------------------------------------------------------------------------------------------------------------------------------------------------------------------------------------------------------------------|----------------------------------------------------------------------------------------------------------|
| <i>Scheduling</i>                                                                                 | 4                                                                                      | 1                                                                                                                                                                                                                                   | 0                                                                                                        |
| <i>Disliked aspect of study visit</i><br>(e.g. too far, disliked blood draw, questionnaires, etc) | 2                                                                                      | 1                                                                                                                                                                                                                                   | 0                                                                                                        |
| <i>Physician/PCP recommended they not participate</i>                                             | 2                                                                                      | 0                                                                                                                                                                                                                                   | 2                                                                                                        |
| <i>Surgery</i> (or issues related to medical condition predating participation)                   | 3                                                                                      | 1                                                                                                                                                                                                                                   | 2                                                                                                        |
| <i>Symptoms</i>                                                                                   | 2<br>a) Felt dizzy<br><br>b) Felt uneasiness (which dissipated) and some muscular pain | 4<br>a) Irritability, depression, suicidal thoughts and nausea after 10 pills<br><br>b) Leg pain that subsided following discontinuation<br><br>c) Muscle pain attributed to study medication<br><br>d) Upper respiratory infection | 1<br><br>Muscle pain (also concerned about alcohol plus study medication)                                |
| <i>Miscellaneous</i>                                                                              | 0                                                                                      | 2<br>a) Went out of town, forgot to take meds, did not return for f/u<br><br>b) Due to preexisting tracheostomy, could not take study medications without opening capsules                                                          | 1<br><br>Study psychiatrist felt participation inappropriate (history of depression and suicide attempt) |

**Table 2. Statin Effects on Lipids.**

|                               | <b>All</b>                   |                             |                             |                              | <b>Men</b>                   |                              |                             |                              | <b>Women</b>                 |                             |                             |                             |
|-------------------------------|------------------------------|-----------------------------|-----------------------------|------------------------------|------------------------------|------------------------------|-----------------------------|------------------------------|------------------------------|-----------------------------|-----------------------------|-----------------------------|
|                               | Mean (SD)<br>95% CI          |                             |                             |                              | Mean (SD)<br>95% CI          |                              |                             |                              | Mean (SD)<br>95% CI          |                             |                             |                             |
| <b>Completers</b>             | N=279                        | N=558                       | N=280                       | N=278                        | N=193                        | N=368                        | N=184                       | N=184                        | N=86                         | N=190                       | N=96                        | N=94                        |
|                               | <b>Placebo</b>               | <b>Statin</b>               | <b>Prava</b>                | <b>Simva</b>                 | <b>Placebo</b>               | <b>Statin</b>                | <b>Prava</b>                | <b>Simva</b>                 | <b>Placebo</b>               | <b>Statin</b>               | <b>Prava</b>                | <b>Simva</b>                |
| ΔTotal cholesterol, completer | -2.10<br>(25.8)<br>-92, 86   | -51.9<br>(29.1)<br>-134, 69 | -46.6<br>(28.5)<br>-102, 42 | -57.2<br>(28.7)<br>-134, 69  | -3.01<br>(24.7)<br>-92, 57   | -51.1<br>(27.7)<br>-124, 42  | -46.8<br>(28.9)<br>-102, 42 | -55.3<br>(25.9)<br>-124, 18  | -0.058<br>(28.0)<br>-76, 86  | -53.6<br>(31.5)<br>-134, 69 | -46.3<br>(27.9)<br>-101, 30 | -61.0<br>(33.4)<br>-134, 69 |
| P                             | -----                        | <b>&lt;0.0001</b>           | <b>&lt;0.0001</b>           | <b>&lt;0.0001</b>            | -----                        | <b>&lt;0.0001</b>            | <b>&lt;0.0001</b>           | <b>&lt;0.0001</b>            | -----                        | <b>&lt;0.0001</b>           | <b>&lt;0.0001</b>           | <b>&lt;0.0001</b>           |
| ΔLDL, completer               | -1.10<br>(24.0)<br>-84, 67   | -44.7<br>(25.1)<br>-103, 78 | -40.4<br>(24.4)<br>-103, 28 | -49.0<br>(25.1)<br>-102, 78  | -1.96<br>(23.4)<br>-84, 67   | -44.4<br>(23.8)<br>-102, 34  | -41.0<br>(24.2)<br>-95, 28  | -47.7<br>(22.9)<br>-102, 34  | 0.83<br>(25.4)<br>-71, 60    | -45.4<br>(27.6)<br>-103, 78 | -39.4<br>(24.9)<br>-103, 27 | -51.6<br>(29.0)<br>-95, 78  |
| P                             | -----                        | <b>&lt;0.0001</b>           | <b>&lt;0.0001</b>           | <b>&lt;0.0001</b>            | -----                        | <b>&lt;0.0001</b>            | <b>&lt;0.0001</b>           | <b>&lt;0.0001</b>            | -----                        | <b>&lt;0.0001</b>           | <b>&lt;0.0001</b>           | <b>&lt;0.0001</b>           |
| ΔHDL, completer               | -1.80<br>(8.71)<br>-34, 33   | -1.89<br>(9.69)<br>-37, 47  | -1.85<br>(9.98)<br>-36, 47  | -1.94<br>(9.40)<br>-37, 32   | -1.08<br>(8.51)<br>-34, 33   | -1.23<br>(8.65)<br>-37, 45   | -1.74<br>(8.72)<br>-36, 45  | -0.72<br>(8.58)<br>-37, 32   | -3.41<br>(9.01)<br>-26, 19   | -3.16<br>(11.3)<br>-36, 47  | -2.04<br>(12.1)<br>-36, 47  | -4.31<br>(10.5)<br>-32, 18  |
| P                             | -----                        | <b>0.89</b>                 | <b>0.95</b>                 | <b>0.86</b>                  | -----                        | <b>0.84</b>                  | <b>0.45</b>                 | <b>0.69</b>                  | -----                        | <b>0.86</b>                 | <b>0.39</b>                 | <b>0.54</b>                 |
| ΔTrig, completer              | -2.09<br>(58.9)<br>-333, 275 | -19.5<br>(60.5)<br>-623,285 | -13.1<br>(58.3)<br>-266,285 | -25.9<br>(62.0)<br>-623, 181 | -2.11<br>(64.1)<br>-333, 275 | -17.6<br>(61.0)<br>-266, 285 | -9.78<br>(65.4)<br>-266,285 | -25.3<br>(55.2)<br>-192, 181 | -2.03<br>(45.1)<br>-118, 118 | -23.2<br>(59.5)<br>-623, 72 | -19.3<br>(41.0)<br>-151, 67 | -27.1<br>(73.8)<br>-623, 72 |
| P                             | -----                        | <b>0.0001</b>               | <b>0.027</b>                | <b>&lt;0.0001</b>            | -----                        | <b>0.0053</b>                | <b>0.25</b>                 | <b>0.0002</b>                | -----                        | <b>0.0036</b>               | <b>0.0073</b>               | <b>0.0072</b>               |
| <b>LVCF</b>                   | <b>N=322</b>                 | <b>N=645</b>                | <b>N=324</b>                | <b>N=321</b>                 | <b>N=219</b>                 | <b>N=440</b>                 | <b>N=220</b>                | <b>N=220</b>                 | <b>N=103</b>                 | <b>N=205</b>                | <b>N=104</b>                | <b>N=101</b>                |
| ΔTotal cholesterol, LVCF      | -1.69<br>(25.2)<br>-92, 86   | -51.2<br>(28.6)<br>-134, 69 | -46.2<br>(28.0)<br>-102, 42 | -56.3<br>(28.4)<br>-134, 69  | -2.43<br>(24.2)<br>-92, 57   | -50.4<br>(27.4)<br>-124, 42  | -46.4<br>(28.3)<br>-102, 42 | -54.4<br>(25.9)<br>-124, 28  | -0.11<br>(27.4)<br>-76, 86   | -53.1<br>(31.1)<br>-134, 69 | -45.8<br>(27.5)<br>-101, 30 | -60.6<br>(32.9)<br>-134, 69 |
| P                             | -----                        | <b>&lt;0.0001</b>           | <b>&lt;0.0001</b>           | <b>&lt;0.0001</b>            | -----                        | <b>&lt;0.0001</b>            | <b>&lt;0.0001</b>           | <b>&lt;0.0001</b>            | -----                        | <b>&lt;0.0001</b>           | <b>&lt;0.0001</b>           | <b>&lt;0.0001</b>           |
| ΔLDL, LVCF                    | -0.98<br>(24.0)<br>-84, 67   | -44.5<br>(24.9)<br>-105, 78 | -40.2<br>(24.6)<br>-105, 28 | -48.9<br>(24.6)<br>-102, 78  | -1.24<br>(22.8)<br>-84, 67   | -44.1<br>(23.8)<br>-105, 34  | -40.5<br>(24.6)<br>-105, 28 | -47.6<br>(22.5)<br>-102, 34  | -0.44<br>(26.4)<br>-71, 65   | -45.5<br>(27.2)<br>-103, 78 | -39.4<br>(24.6)<br>-103, 27 | -51.8<br>(28.5)<br>-95, 78  |
| P                             | -----                        | <b>&lt;0.0001</b>           | <b>&lt;0.0001</b>           | <b>&lt;0.0001</b>            | -----                        | <b>&lt;0.0001</b>            | <b>&lt;0.0001</b>           | <b>&lt;0.0001</b>            | -----                        | <b>&lt;0.0001</b>           | <b>&lt;0.0001</b>           | <b>&lt;0.0001</b>           |
| ΔHDL, LVCF                    | -1.51<br>(8.87)<br>-34, 33   | -1.46<br>(9.60)<br>-37, 47  | -1.51<br>(9.95)<br>-36, 47  | -1.40<br>(9.26)<br>-37, 32   | -1.08<br>(8.74)<br>-34, 33   | -0.92<br>(8.53)<br>-37, 45   | -1.56<br>(8.55)<br>-36, 45  | -0.28<br>(8.48)<br>-37, 32   | -2.42<br>(9.11)<br>-26, 21   | -2.60<br>(11.5)<br>-36, 47  | -1.40<br>(12.5)<br>-36, 47  | -3.84<br>(10.4) -<br>32, 18 |
| P                             | -----                        | <b>0.94</b>                 | <b>0.99</b>                 | <b>0.88</b>                  | -----                        | <b>0.83</b>                  | <b>0.56</b>                 | <b>0.33</b>                  | -----                        | <b>0.89</b>                 | <b>0.50</b>                 | <b>0.30</b>                 |
| ΔTrig, LVCF                   | -1.84<br>(58.6)<br>-333, 275 | -19.0<br>(61.3)<br>-623,285 | -13.4<br>(60.1)<br>-266,285 | -24.6<br>(62.0)<br>-623, 181 | -2.27<br>(62.0)<br>-333, 275 | -16.9<br>(62.2)<br>-266, 285 | -10.9<br>(67.3)<br>-266,285 | -22.9<br>(56.0)<br>-192, 181 | -0.92<br>(51.1)<br>-189, 135 | -23.5<br>(59.2)<br>-623, 72 | -18.8<br>(40.5)<br>-151, 67 | -28.2<br>(73.5)<br>-623, 72 |
| P                             | -----                        | <b>&lt;0.0001</b>           | <b>0.014</b>                | <b>&lt;0.0001</b>            | -----                        | <b>0.0046</b>                | <b>0.16</b>                 | <b>0.0003</b>                | -----                        | <b>0.0012</b>               | <b>0.0060</b>               | <b>0.0024</b>               |

HDL=high density lipoprotein cholesterol; LDL=low density lipoprotein cholesterol; LVCF=last value carried forward; trig=triglycerides.
